# Supplementary material for: A novel imidazolate-bridged heterodinuclear Cu(ii)Zn(ii) complex derived from a unique macrocyclic ligand with two hydroxyethyl pendants
Source: Royal Society of Chemistry journal article supplement (doi:10.1039/b300013c), 2003-01-01
Supplement: b300013c.doc [file b300013c.doc]

**Experimental Section**

**Materials.** All reagents were obtained from commercial suppliers and used without further purification unless otherwise noted. Solvents were purified by standard methods before use. The macrocyclic ligand L was prepared by the procedure described previously.[[1]](#footnote-2)

**[(CuimCu)L](ClO4)30.5H2O (1).** To a methanol solution (5 mL) of Cu(ClO4)26H2O (0.1025 g, 0.277 mmol), a solution of imidazole (0.0188 g, 0.277 mmol) in methanol (2 mL) was added dropwise in 10 min. The resulting blue solution was stirred for half an hour, and then was added dropwise to a methanol solution (10 mL, pH *ca*. 9) of L (0.066 g, 0.133 mmol). Afterward, the resultant deep-blue solution (pH *ca*. 6) was stirred for another 0.5 hour at room temperature and led to a blue precipitate, which was filtered and washed with methanol and ether (yield: 91%). The blue precipitate was dissolved in 3 mL CH3CN and recrystallized by slow diffusion of methanol at ambient temperature. Block, blue crystals were obtained after several days. *Anal*. Calcd. for C31H50Cl3Cu2N8O14.5: C, 37.23%; H, 5.04%; N, 10.63%. Found: C, 37.66%; H, 4.93%; N, 10.85%.

**[(CuimZnL-2H)(CuimZnL-H)](ClO4)3 (2).** To a solution of 0.141 g (0.283 mmol) of L in 2 mL water were added 0.105 g (0.283 mmol) of Zn(ClO4)26H2O in 2 mL water and 0.105 g (0.283 mmol) of Cu(ClO4)26H2O in 2 mL water with stirring. After 30 min a solution of 0.0193 g (0.283 mmol) of imidazole in 2 mL water was added. Acetonitrile was added dropwise to the above solution till the resultant small amount of blue precipitate was dissolved. Then, the pH value of the resulting solution was carefully adjusted to *ca*. 9.5 with 0.1 M NaOH solution and the solution turned from blue to green. In this process, much attention should be paid to avoid the appearance of white precipitate (the NaOH solution should be added very slowly to the stirring reaction solution). Platelet, green crystals were obtained by slow evaporation of this solution in air at 15-20 C for several days (yield: 74%). The crystals effloresce quickly in air when they were separated from the mother solution. *Anal*. Calcd. for C62H87Cl3Cu2N16O16Zn2: C, 44.41; H, 5.23; N, 13.37; Cu, 7.58; Zn, 7.80%. Found: C, 44.36; H, 5.29; N, 13.42; Cu, 7.62; Zn, 7.76%.

**Safety Note.** Perchlorate salts of compounds containing organic ligands are potentially explosive, especially when heated or bumped. Only small quantities of these compounds should be prepared and handled behind suitable protective shields.

**Figure S1.** Temperature dependence of the magnetic susceptibility for complex **1** in the form **M () and **eff () vs *T*. The solid lines result from a least-squares fit according to eq 1.

(1)

The best fit for **M versus *T* in the range of 2 – 300 K leads to the following parameters: *-2J* = 86.4(3) cm–1, *g* = 2.10(1), **TIP = 1.03(3)  10–4 cm3mol–1, *p* = 9.00(1)  10–3 and *R* = 5.46  10–9 (*R* = [(**M)obs–(**M)cacld]2/[(**M)obs]2).

**Figure S2.** ESR spectra for complex **1**: (a) polycrystalline powder at room temperature and (b) frozen water/DMSO (1:1) solution at 110 K.

**Figure S3.** ESR spectra for complex **2**: (a) polycrystalline powder at room temperature and (b) frozen water/DMSO (1:1) solution at 110 K.

1. Li, S.-A; Xia, J.; Yang, D.-X.; Xu, Y.; Li, D.-F.; Wu, M.-F.; Tang, W.-X. *Inorg. Chem.* **2002**, *41*, 1807. [↑](#footnote-ref-2)
